# Supplementary material for: Explosive vapour/particles detection using SERS substrates and a hand-held Raman detector
Source: Royal Society of Chemistry journal article supplement (doi:10.1039/d1ra04637c), 2021-01-01
Supplement: d1ra04637c1.pdf [file d1ra04637c1.pdf]

## Supplementary Information

### Explosives vapor/particles detection using SERS substrates and hand-held Raman detector

Vered Heleg-Shabtai,<sup>a\*</sup> Mali Sharon,<sup>a</sup> Amalia Zaltsman,<sup>a</sup> Hagai Sharabi,<sup>a</sup> Ido Nir,<sup>a</sup>  
Dana Marder,<sup>b</sup> Guy Cohen,<sup>c</sup> Izhar Ron,<sup>a</sup> and Alexander Pevzner<sup>a\*</sup>

- Department of Physical Chemistry, Israel Institute for Biological Research, P.O. Box 19, Ness-Ziona 74100 Israel.
- Department of Analytical Chemistry, Israel Institute for Biological Research, P.O. Box 19, Ness-Ziona 74100 Israel.
- Environmental Physics Department, Israel Institute for Biological Research, P.O. Box 19, Ness-Ziona 74100 Israel.

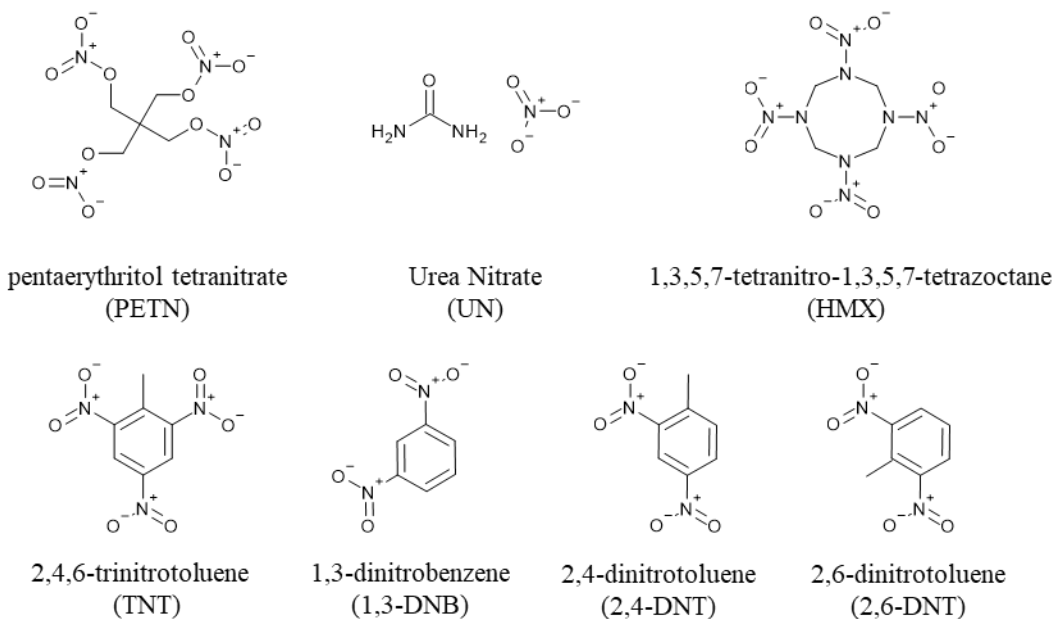

**Fig. S1** Molecular structure of the explosive materials.

**Table S1** The iterative hydroxylamine seeding method.

| Colloid type | Colloidal suspension | H <sub>2</sub> O | $\alpha$ | $\beta$ | Average diameter |
|--------------|----------------------|------------------|----------|---------|------------------|
| B            | sol. A 15 ml         | 135 ml           | 1.25 ml  | 1.5 ml  | 24 nm            |
| C            | sol. B 25 ml         | 75 ml            | 0.562 ml | 1.0 ml  | 39 nm            |
| D            | sol. C 55 ml         | 50 ml            | 0.375 ml | 1.0 ml  | 44 nm            |
| E            | sol. A 50 ml         | 50 ml            | 0.375 ml | 1.0 ml  | 60 nm            |

**Analysis using nanoparticle suspension (A)**

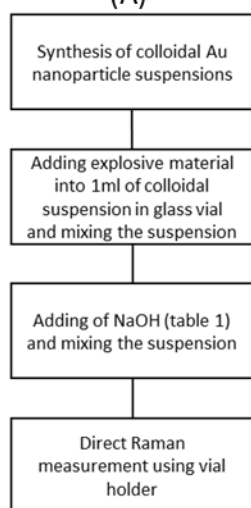

**Analysis of particle samples (B)**

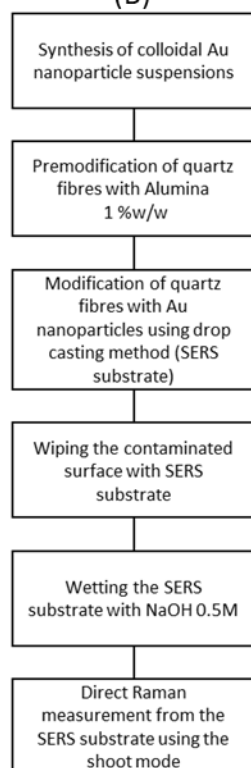

**Analysis of gas phase samples**

**SERS measurements using Au decorated quartz fibers (C)**

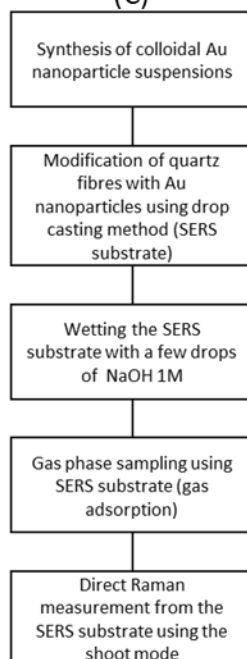

**SERS measurements using Au decorated sponge (D)**

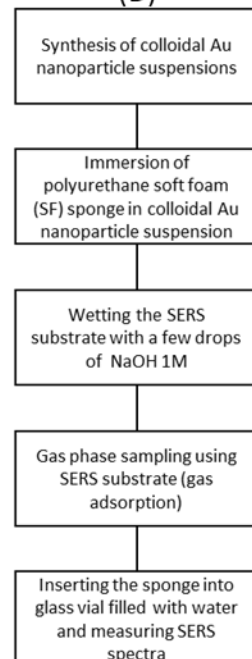**Fig. S2** Procedures for SERS detection of explosives in solution/gas phase/ particles on a surface.

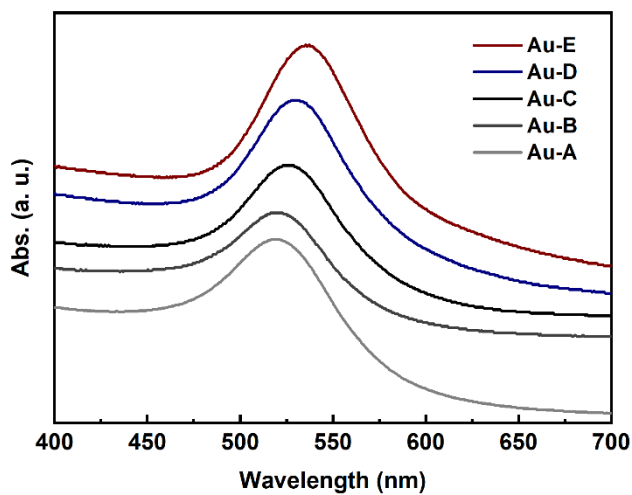

**Fig. S3** UV-Vis spectra of Au colloidal suspensions Au-B to Au-E grown by iterative hydroxylamine seeding of ~12 nm diameter Au colloidal suspension (Au-A).

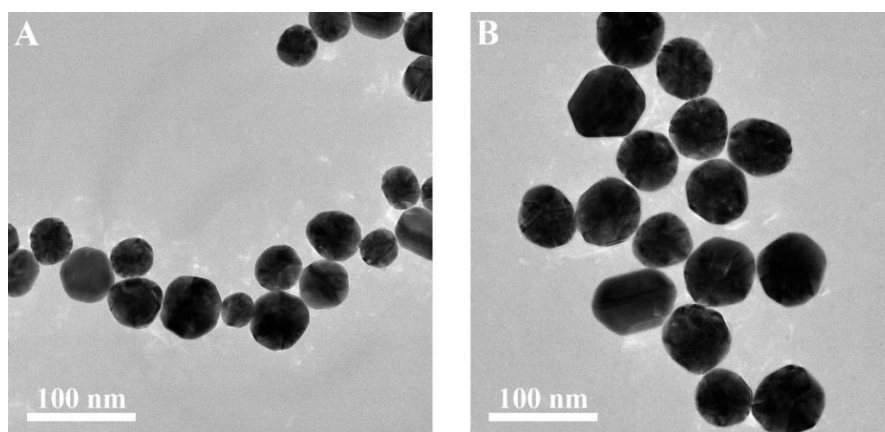

**Fig. S4** Representative TEM images of the Au-D (A) and Au-E (B) nanoparticles.

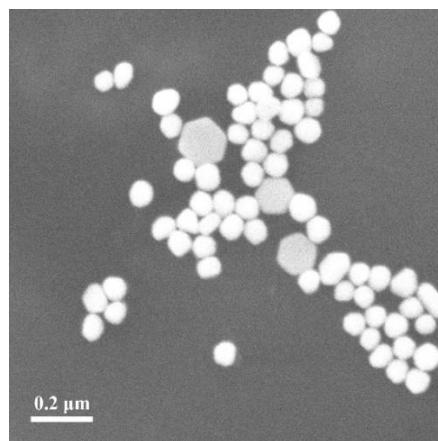

**Fig. S5** Representative SEM image of the Au-Asc nanoparticles.

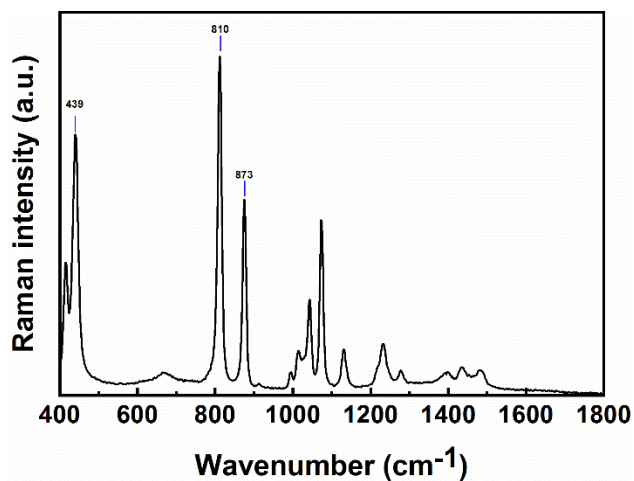

**Fig. S6** Normal Raman spectrum of pentaerythritol using an accumulation time of 10 s.

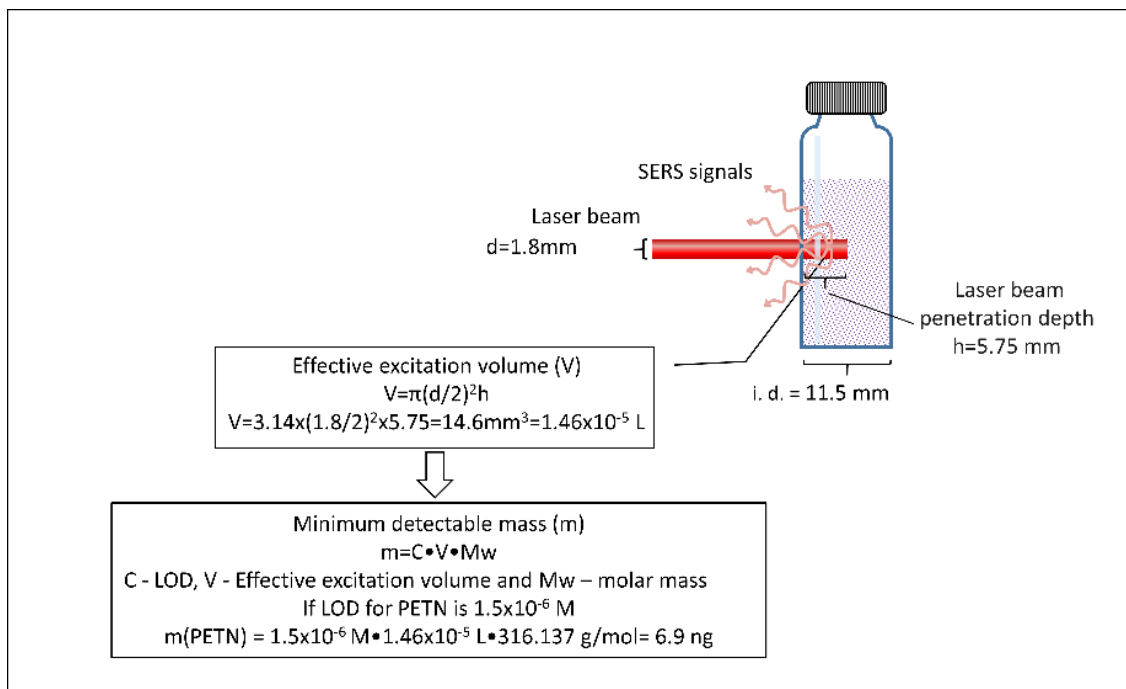

**Fig. S7** Estimation of the minimum detectable mass.

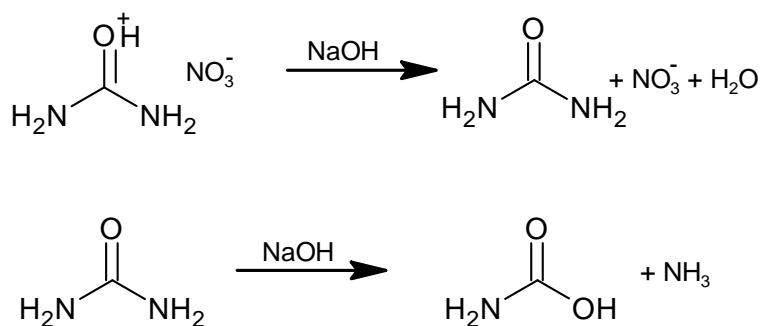

**Fig. S8** Hydrolysis of UN under alkaline conditions

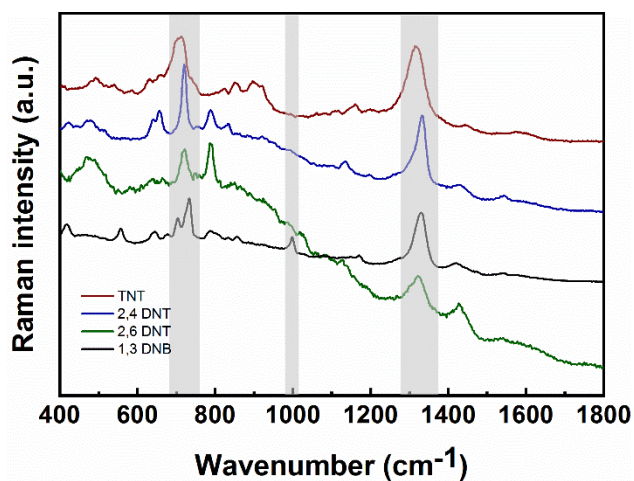

**Fig. S9** Normalized SERS spectra of TNT and its impurities (2,4-DNT, 2,6-DNT, 1,2-DNB) in Au-D nanoparticle suspensions, under alkaline conditions (NaOH 36 mM).

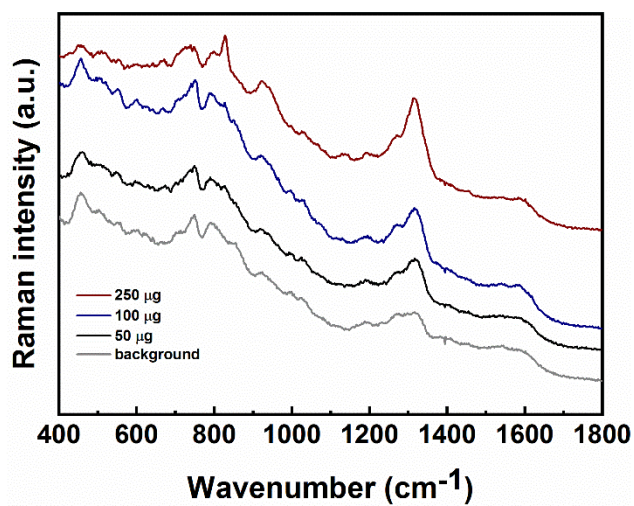

**Fig. S10** Gas-phase 2,4-DNT SERS spectra obtained using sponge-based SERS substrates and an accumulation time of 5 s.

**Table S2** LODs for SERS detection of explosives in solution/ gas phase/ particles on a surface.

| Explosive material | Phase     | LOD<br>(experimental)                                             | LOD<br>(calculated)        |
|--------------------|-----------|-------------------------------------------------------------------|----------------------------|
| PETN               | solution  | 0.48 $\mu\text{g mL}^{-1}$<br>( $1.5 \times 10^{-6} \text{ M}$ )  | 6.9 ng                     |
| HMX                | solution  | 2.4 $\mu\text{g mL}^{-1}$<br>( $8.1 \times 10^{-6} \text{ M}$ )   | 35 ng                      |
| UN                 | solution  | 113 $\mu\text{g mL}^{-1}$<br>( $9.2 \times 10^{-4} \text{ M}$ )   | 165 ng                     |
| TNT                | solution  | 0.024 $\mu\text{g mL}^{-1}$<br>( $1.1 \times 10^{-7} \text{ M}$ ) | 0.35 ng                    |
|                    | particles | 10 $\mu\text{g}$                                                  | 0.53 $\mu\text{g cm}^{-2}$ |
| 2,4-DNT            | gas phase | 0.1 $\mu\text{g}$                                                 | 3.6 ng                     |
| 1,3-DNB            | gas phase | 1.5 $\mu\text{g}$                                                 | 54 ng                      |
